# Supplementary material
Source: publisher figshare collection journal article supplement (https://aacr.figshare.com/articles/dataset/_/23905316)

**Supplemental Figure 10. Correlation between age, telomere length and 1q gain subtype. A.** Correlation between telomere length and chromosome 1 rearrangement subtype **B.** Correlation between age and chromosome 1 rearrangement subtype

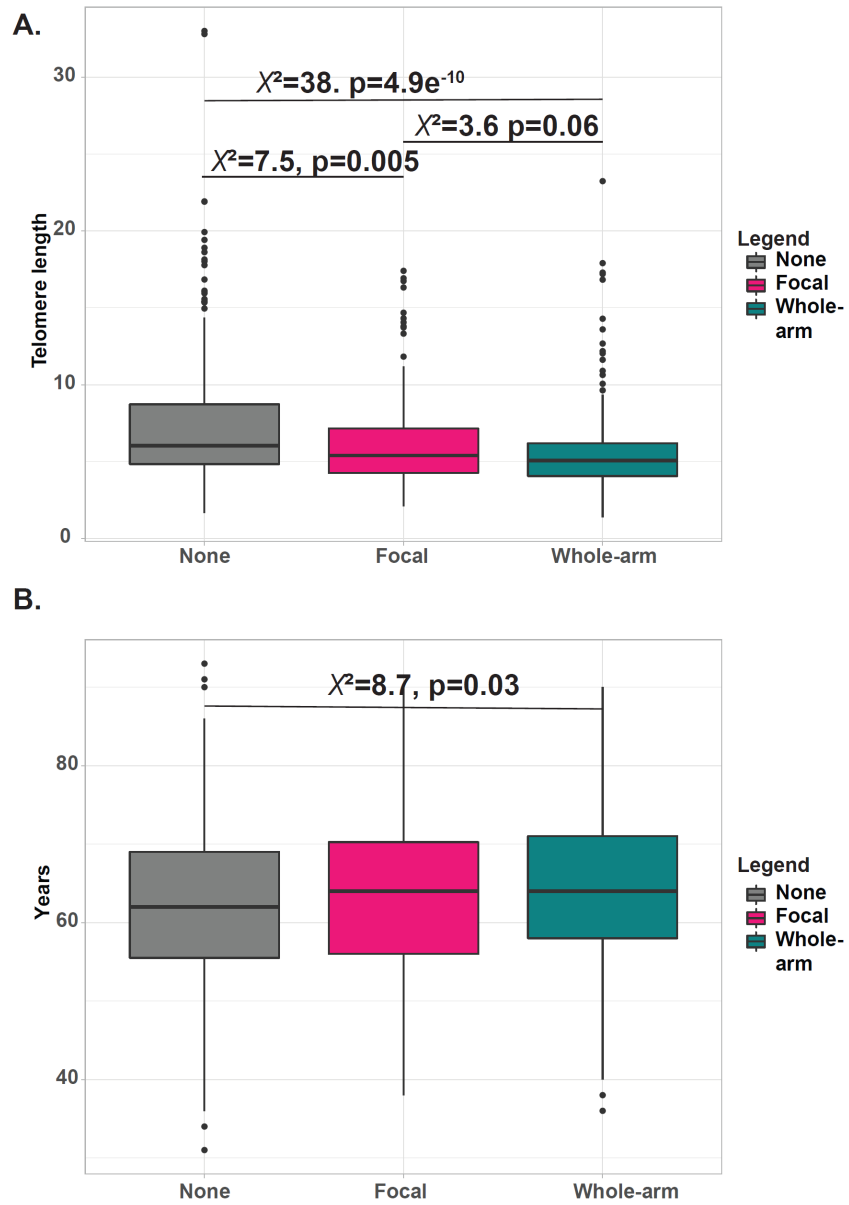

Supplement: Supplementary file 1 [file 41911502]
